# Supplementary material
Source: ML conference proceedings conference paper supplement (https://openreview.net/forum?id=l47YqJxOrK)

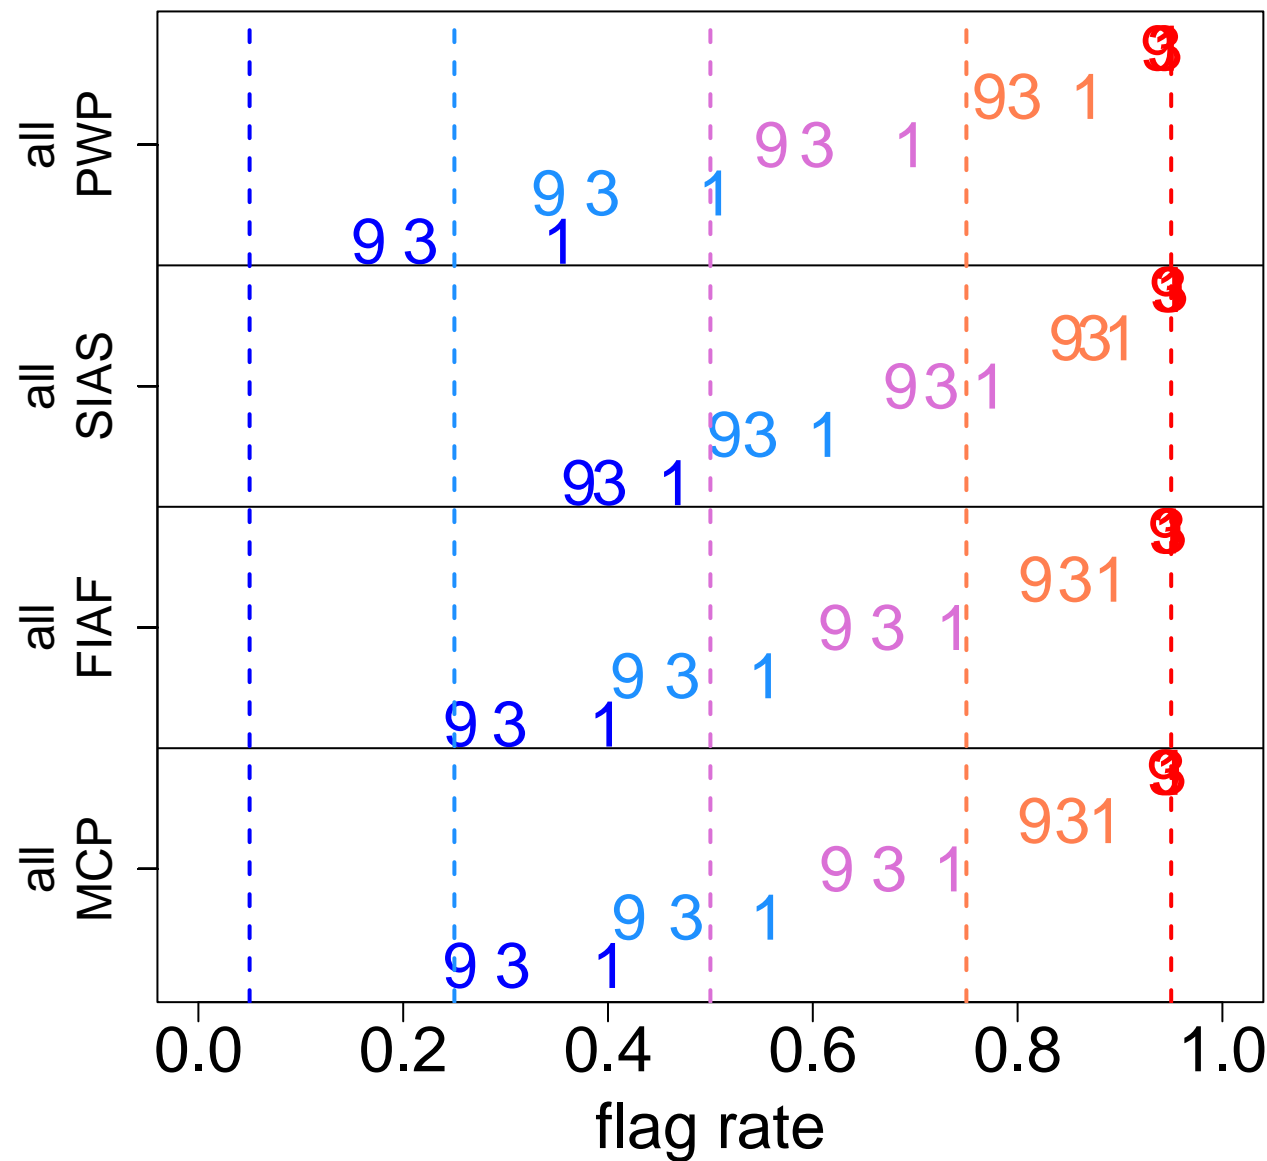

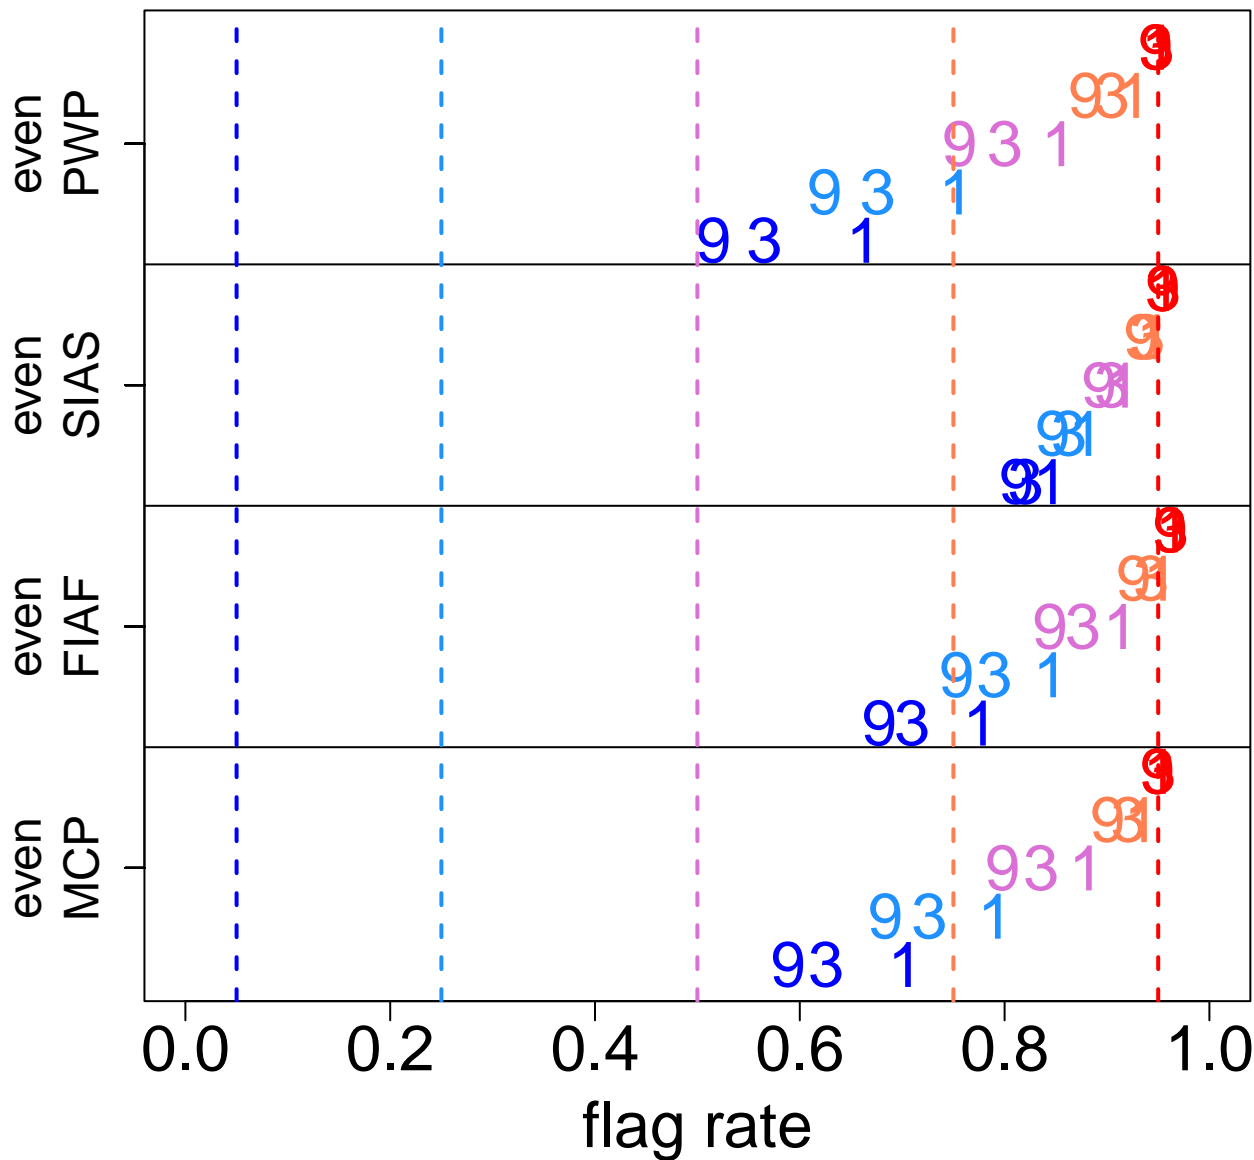

Supplement: supplementary_material [file attachment]

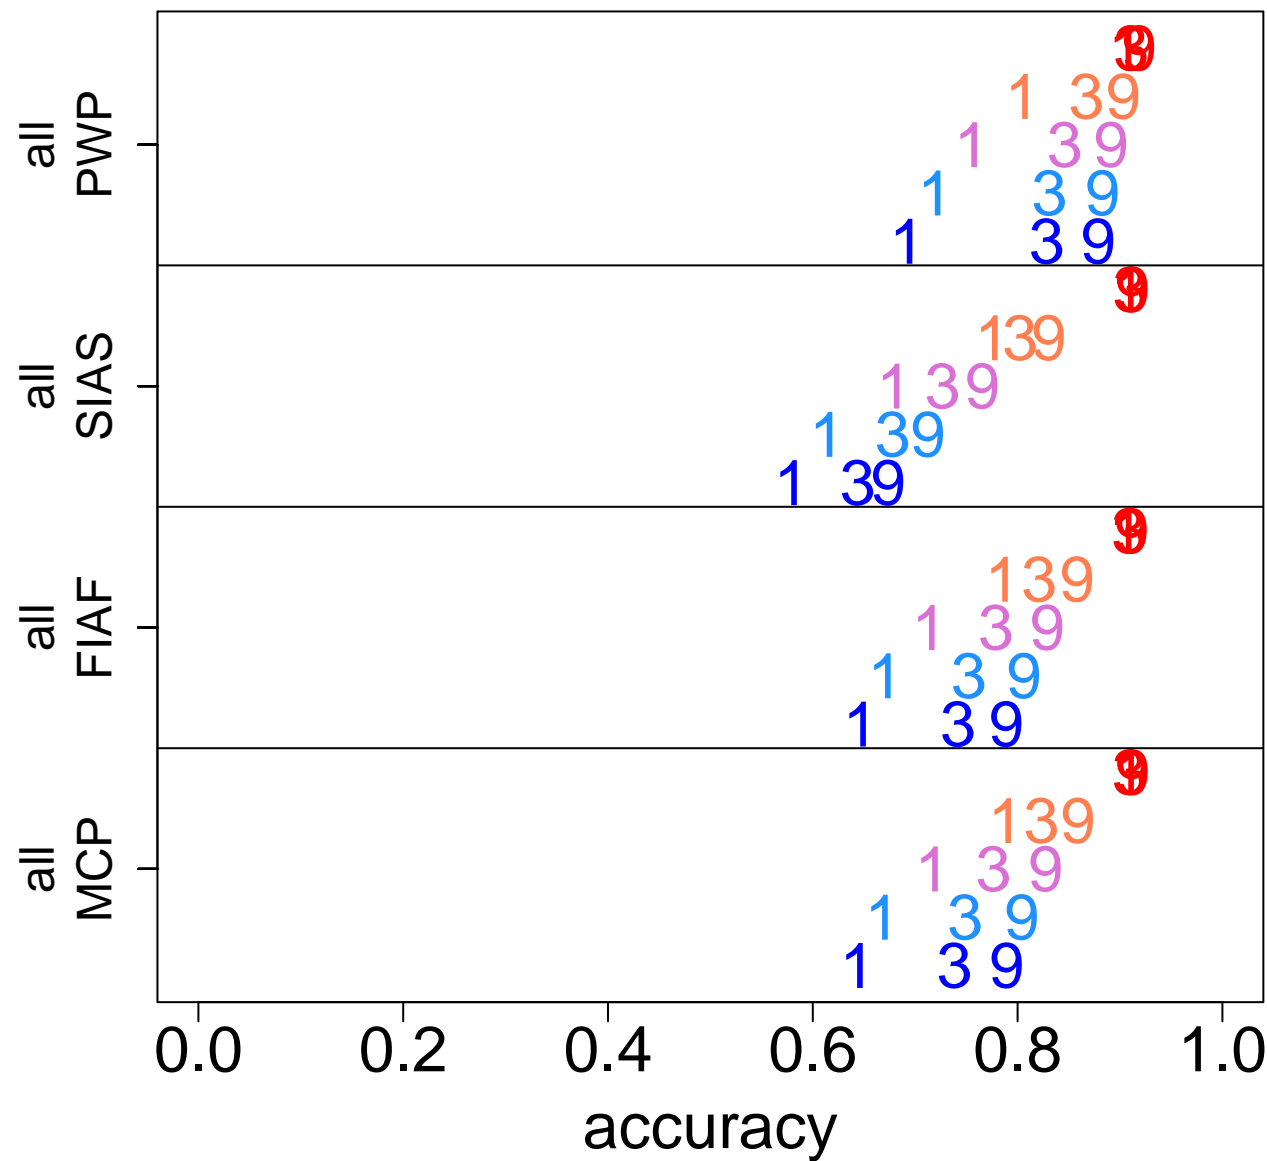

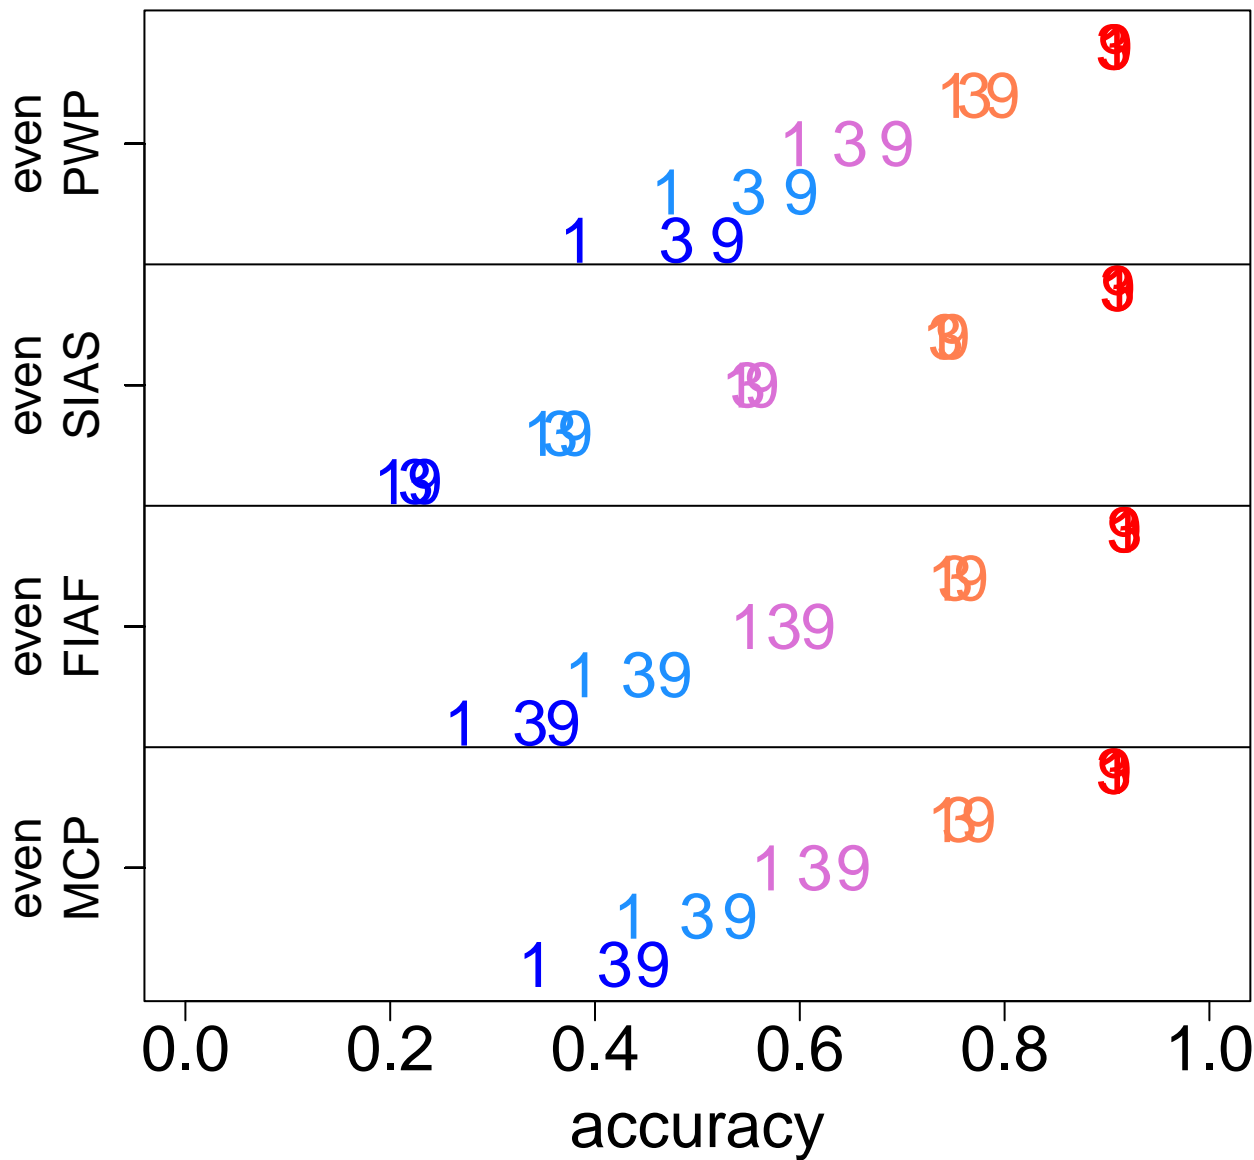

Supplement: supplementary_material [file attachment]

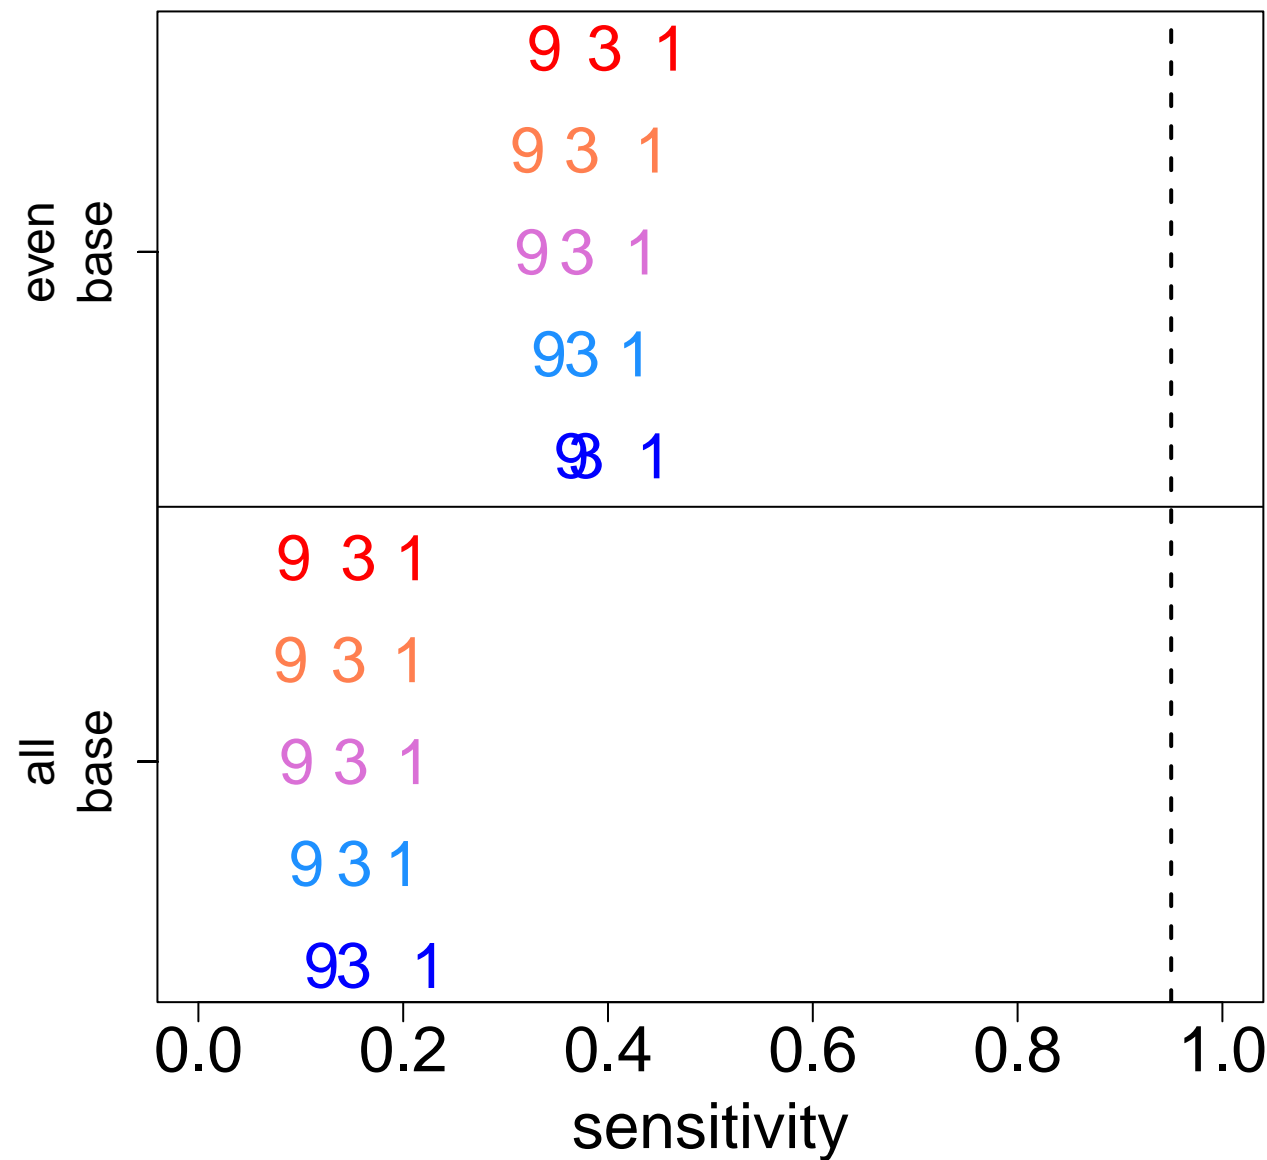

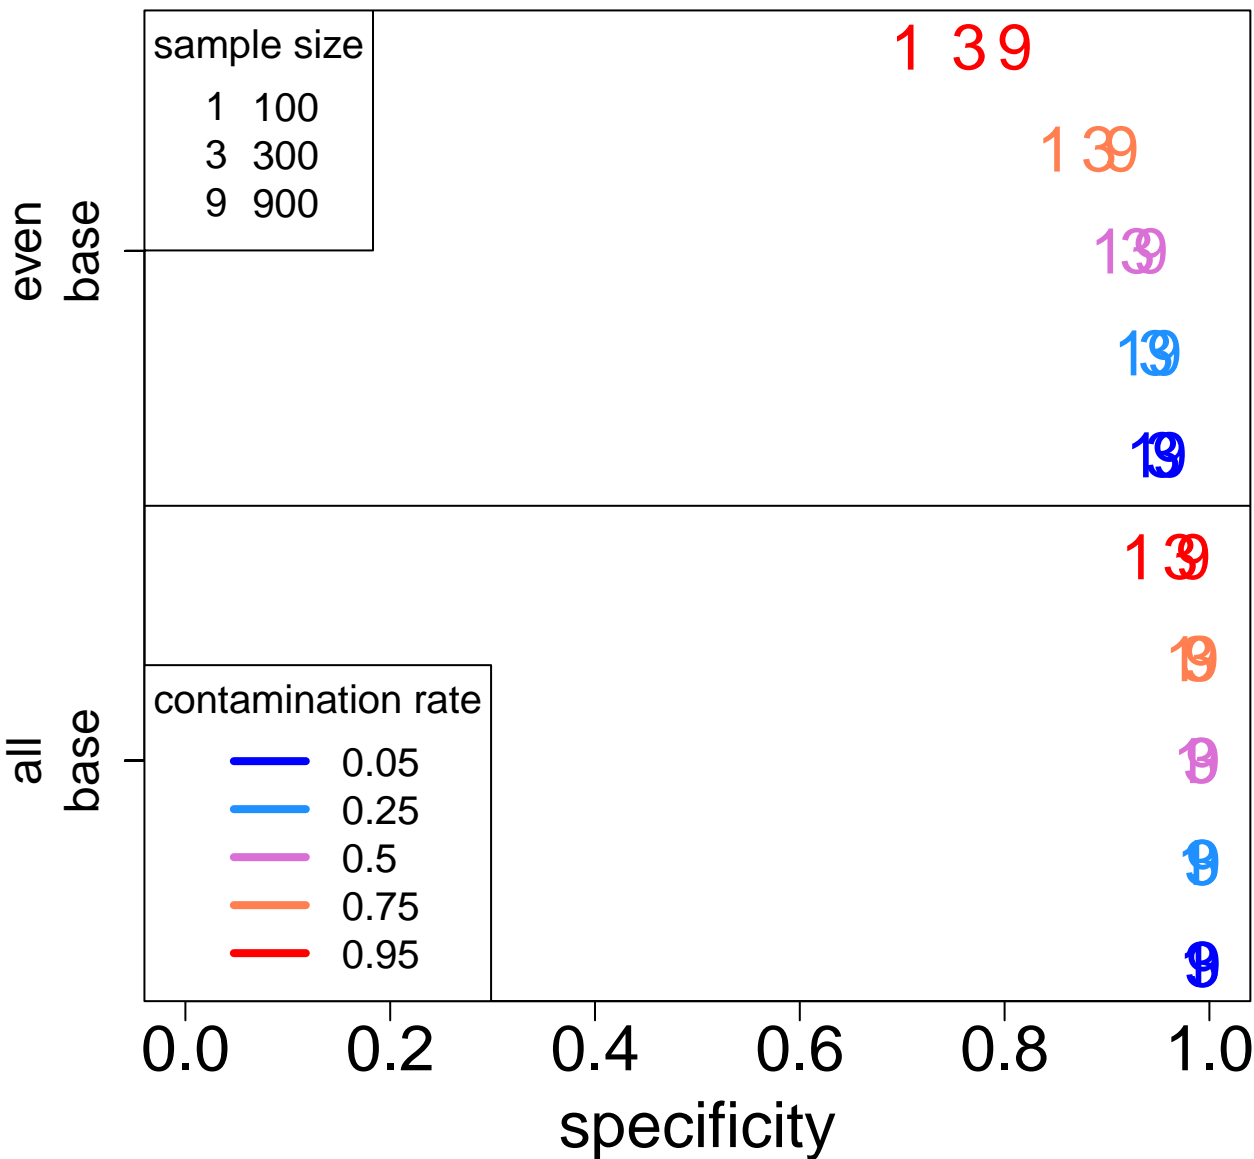

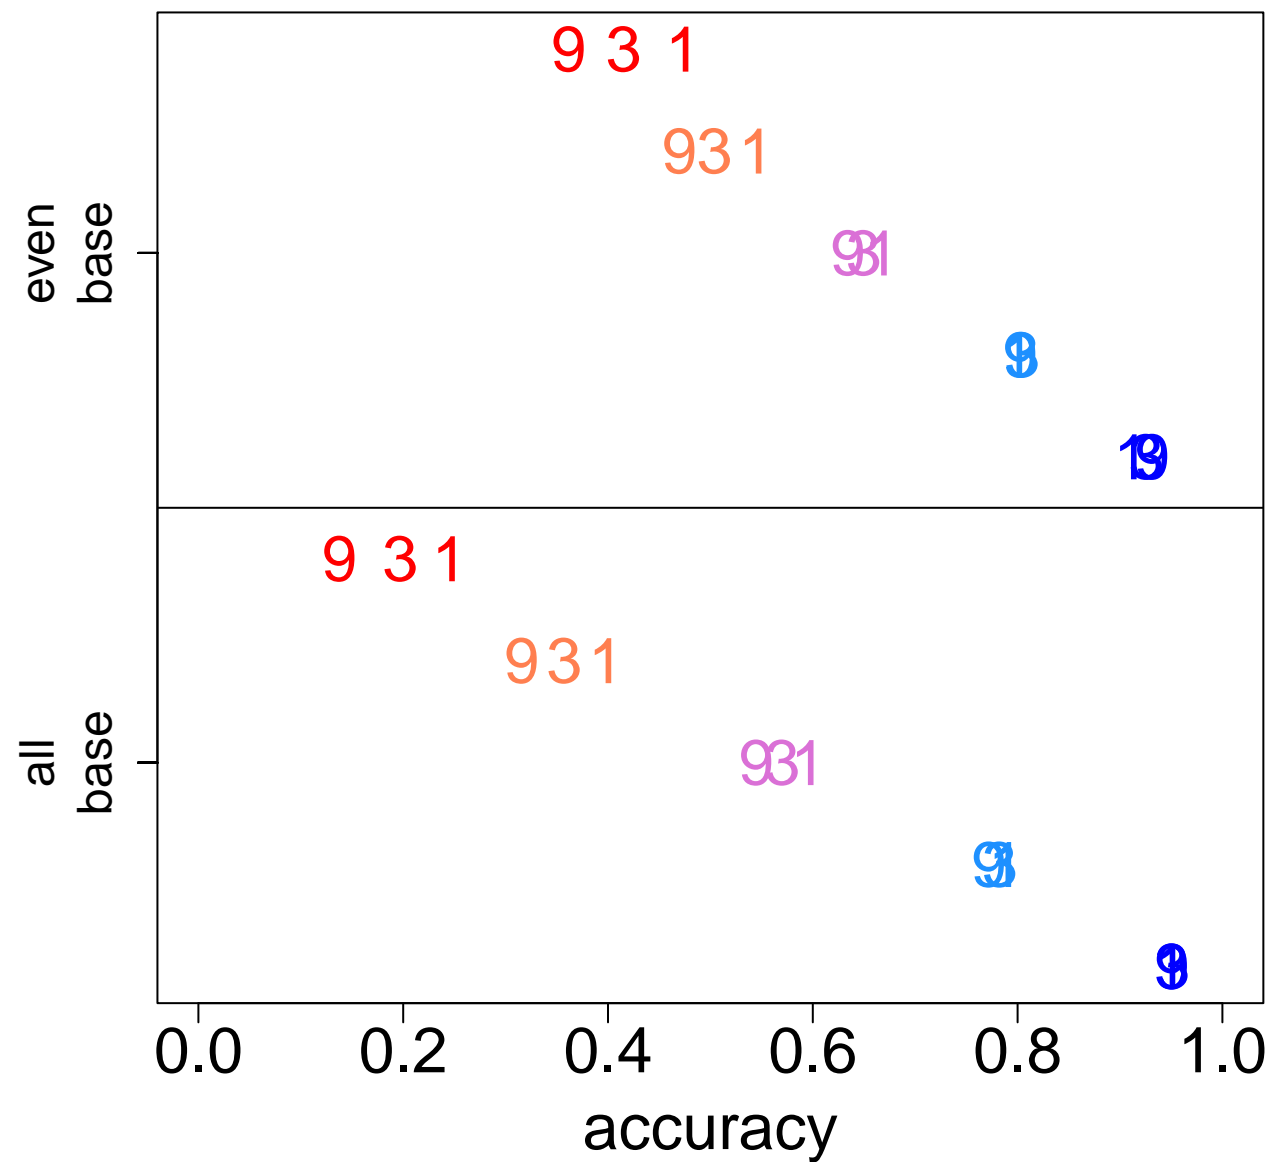

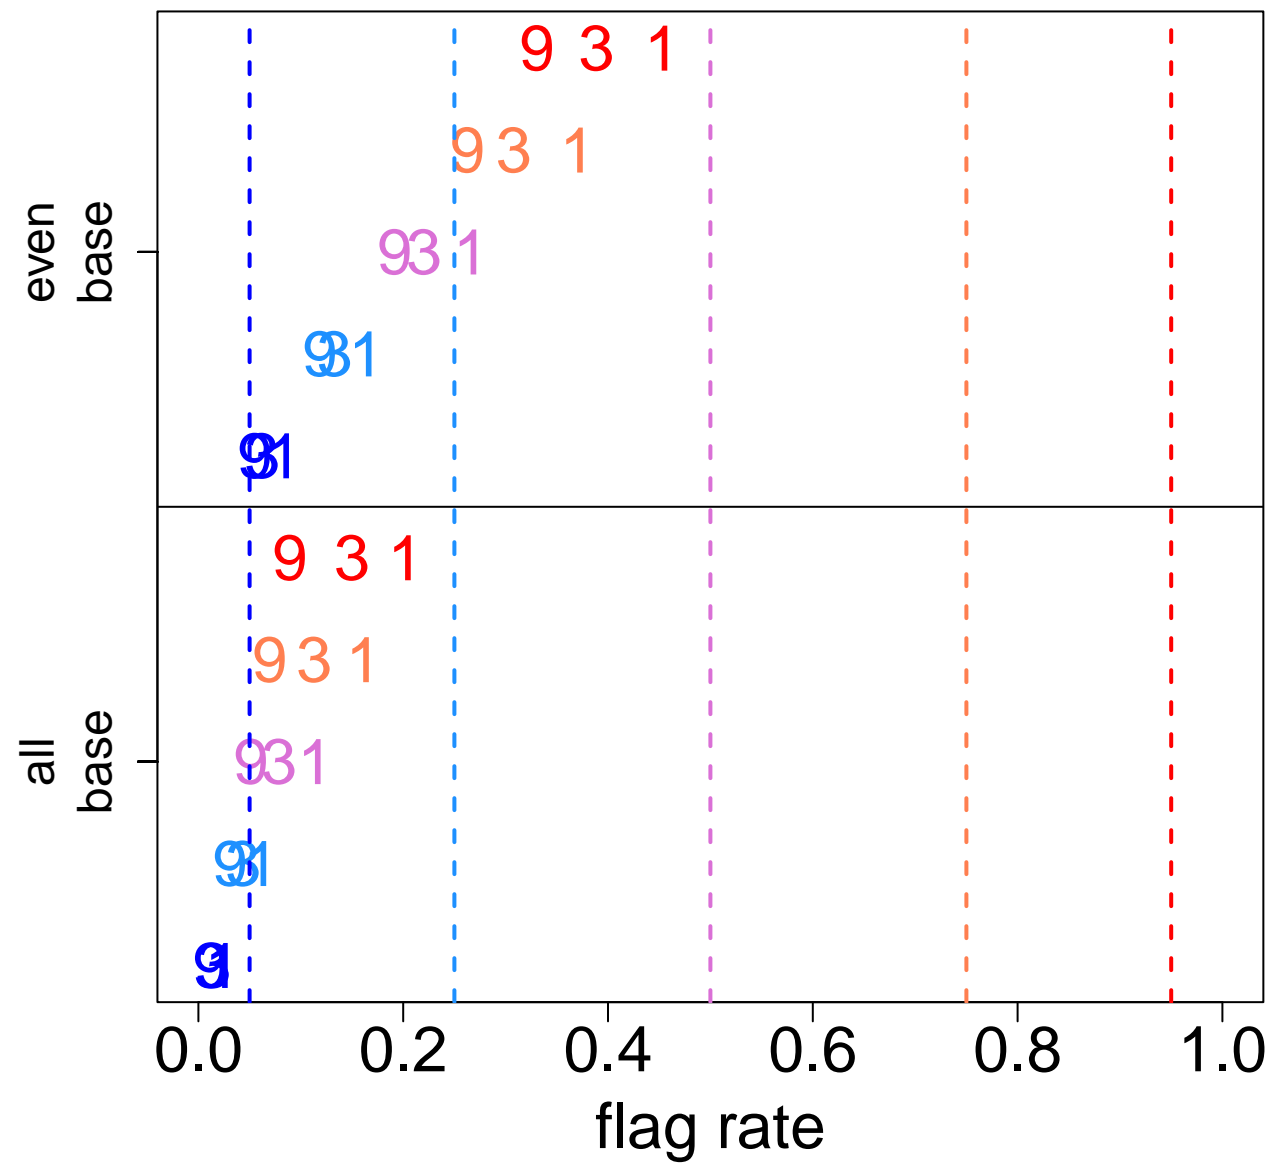

Supplement: supplementary_material [file attachment]

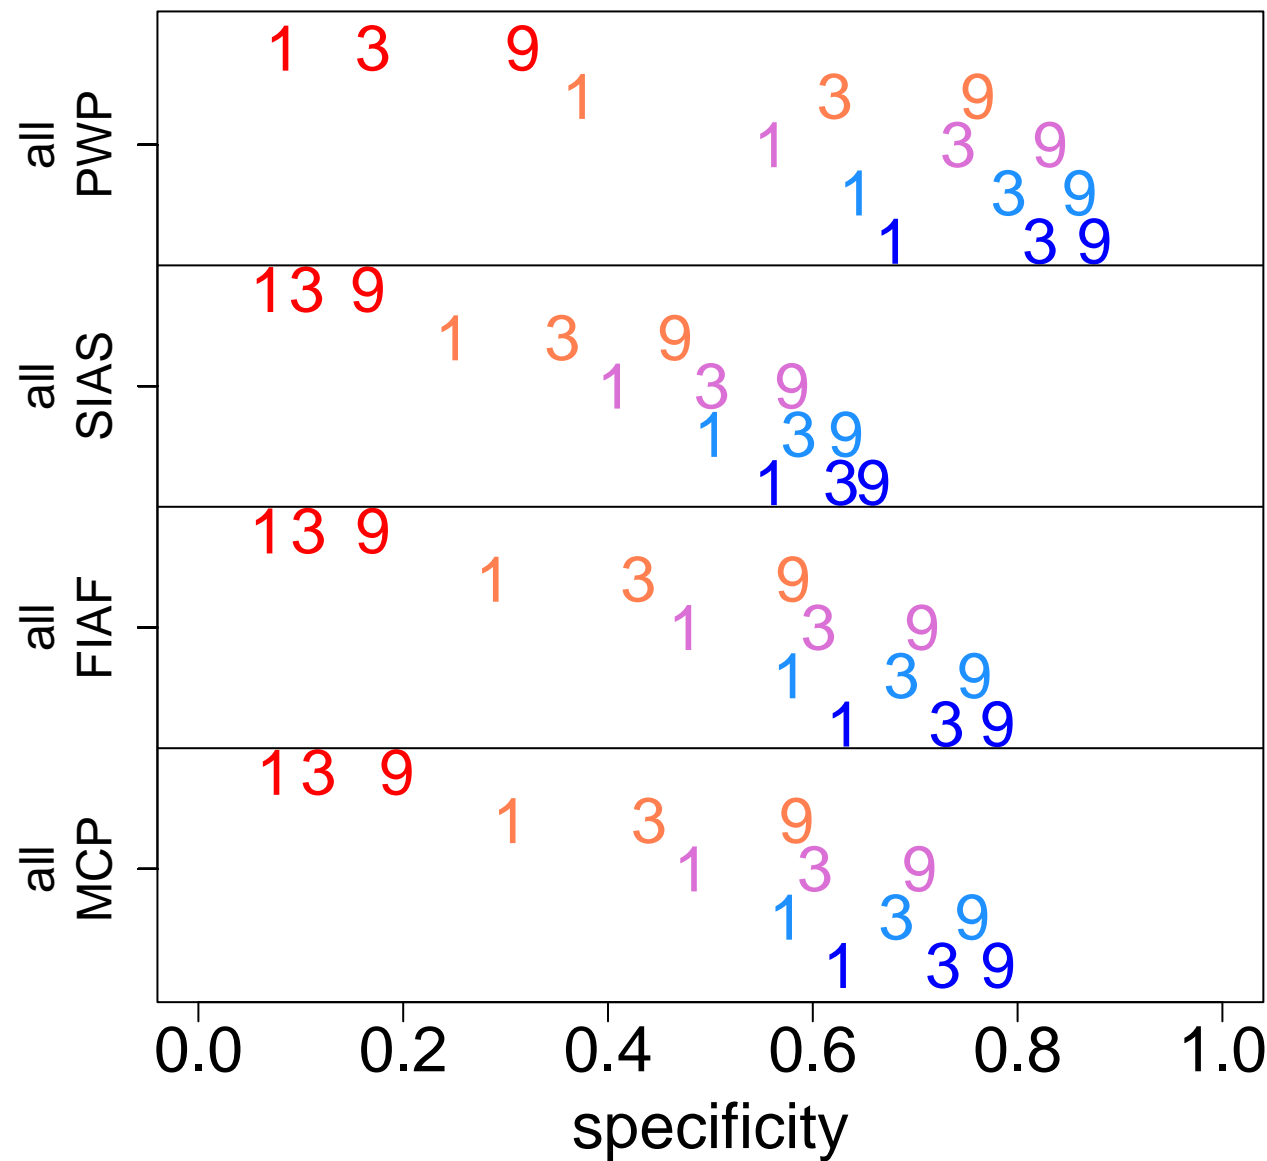

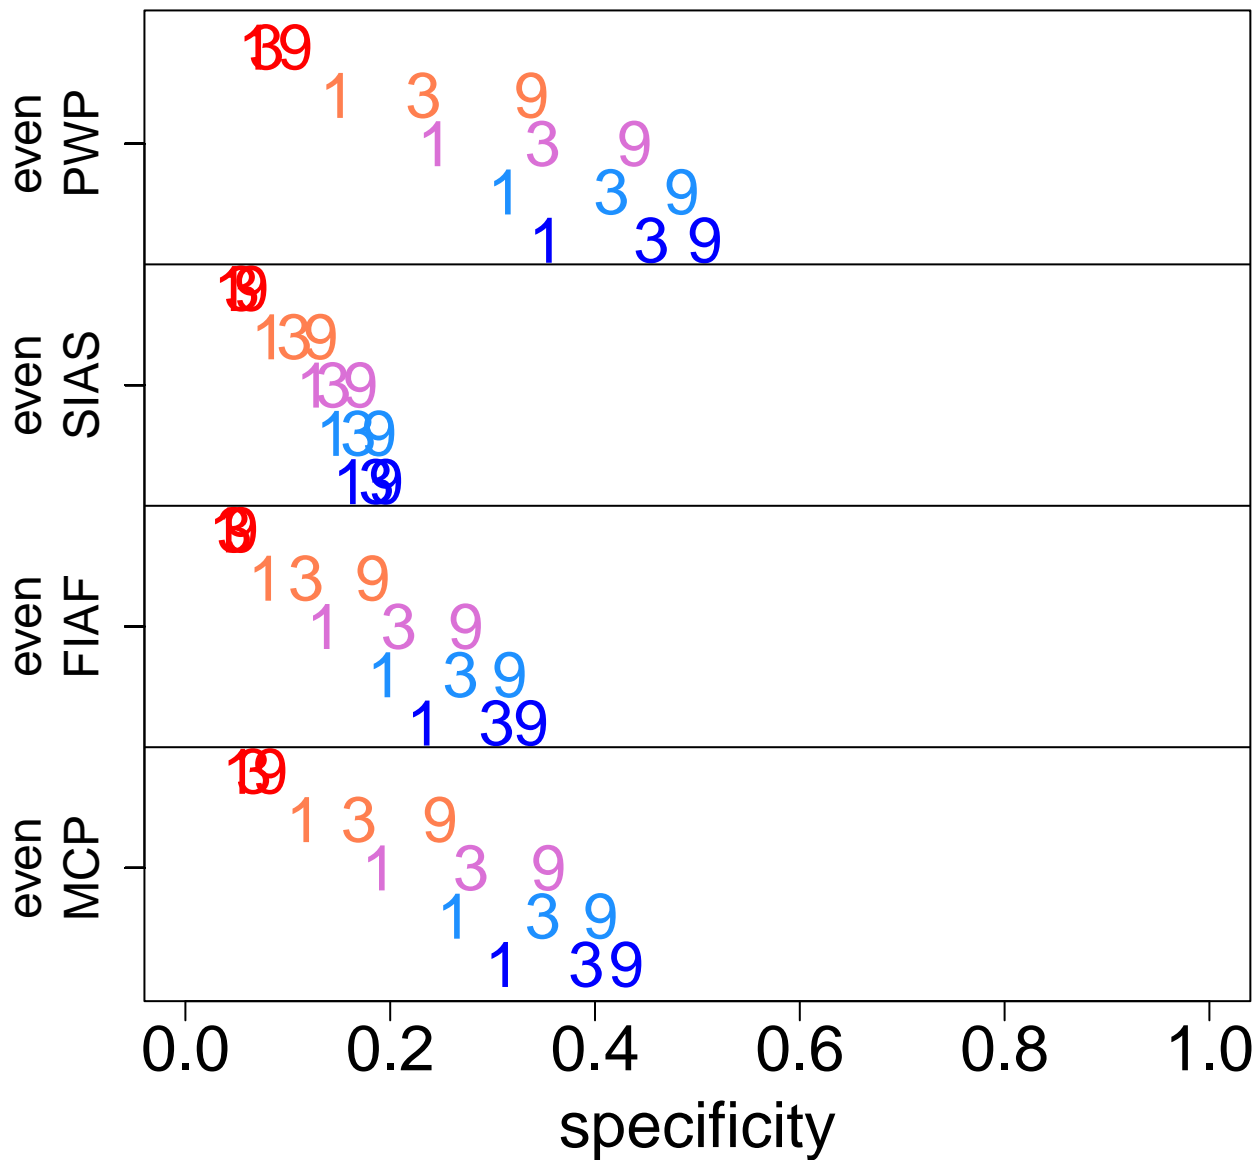

Supplement: supplementary_material [file attachment]

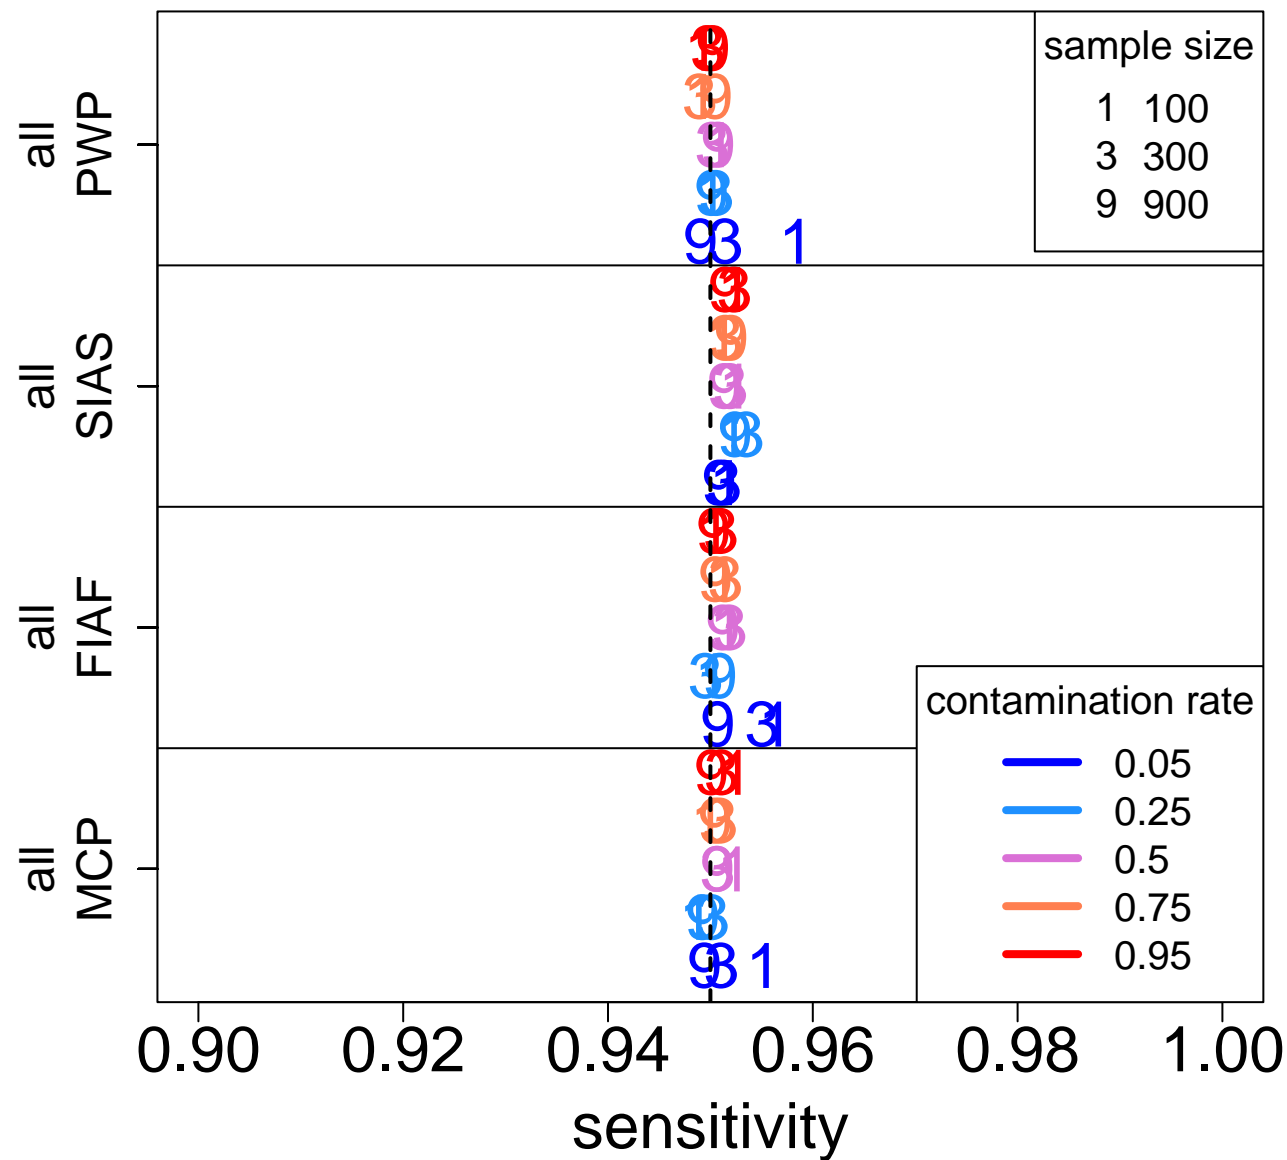

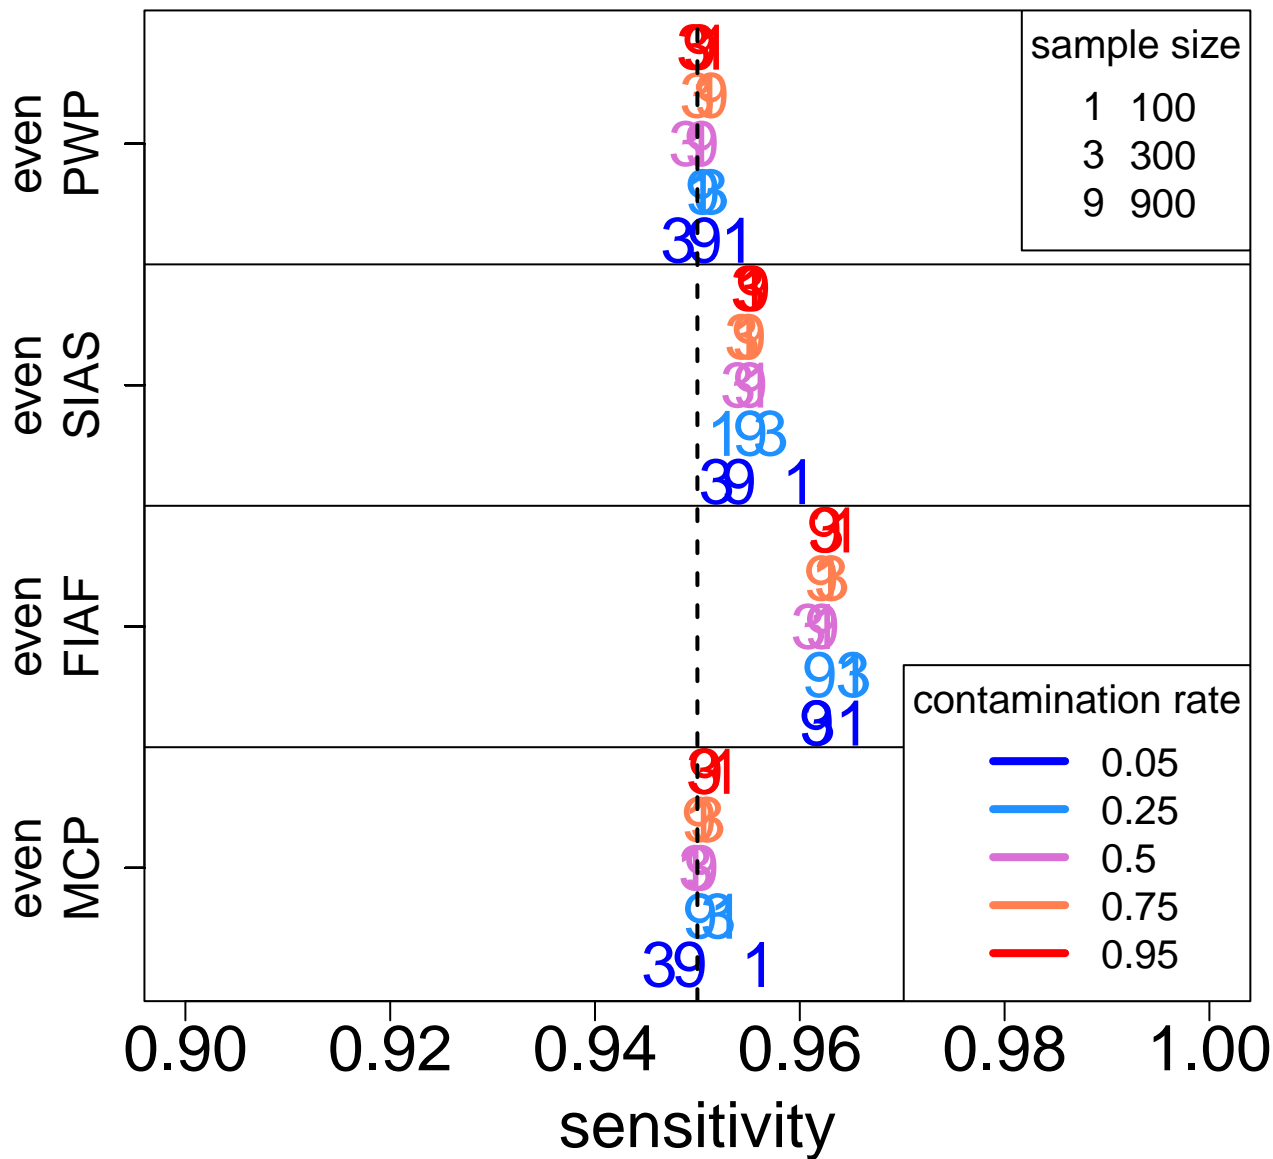

Supplement: supplementary_material [file attachment]
